# Supplementary material for: Effects of alkalinity and salinity at low and high light intensity on hydrogen isotope fractionation of long-chain alkenones produced by Emiliania huxleyi
Source: Copernicus journal article supplement (doi:10.5194/bg-14-5693-2017), 2017-12-20
Supplement: Supplementary file 1 [file bg-14-5693-2017-supplement.pdf]

Supplement of Biogeosciences, 14, 5693–5704, 2017  
<https://doi.org/10.5194/bg-14-5693-2017-supplement>  
© Author(s) 2017. This work is distributed under  
the Creative Commons Attribution 4.0 License.

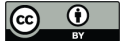

*Supplement of*

**Effects of alkalinity and salinity at low and high light intensity on  
hydrogen isotope fractionation of long-chain alkenones produced  
by *Emiliana huxleyi***

**Gabriella M. Weiss et al.**

*Correspondence to:* Gabriella M. Weiss ([gabriella.weiss@nioz.nl](mailto:gabriella.weiss@nioz.nl))

The copyright of individual parts of the supplement might differ from the CC BY 4.0 License.

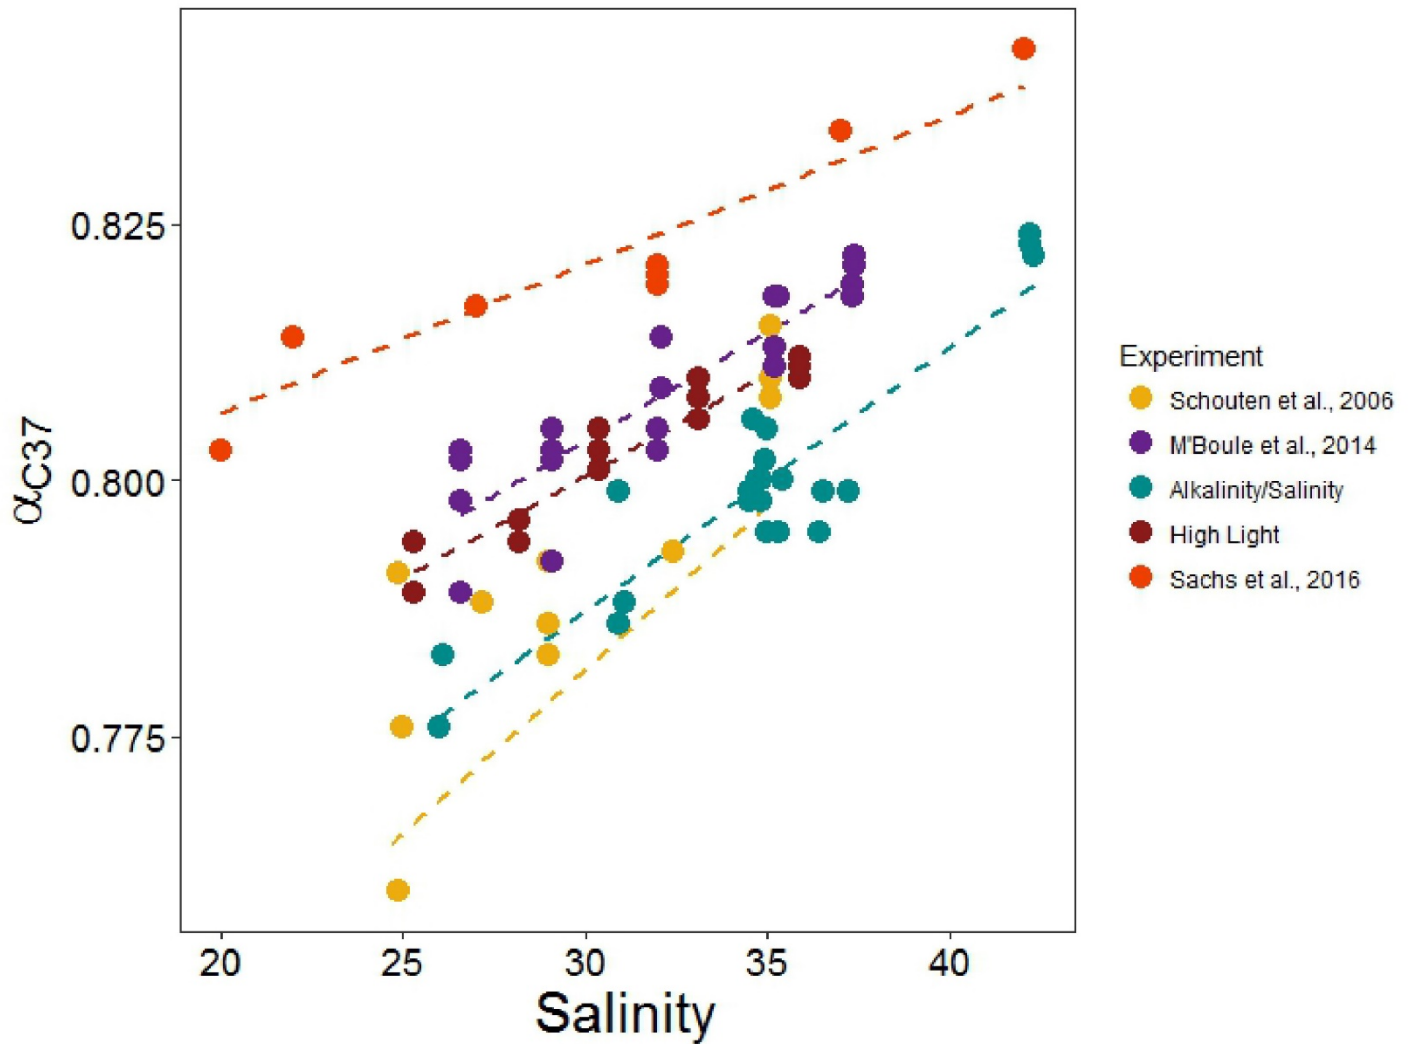

Supplementary Figure 1 shows the hydrogen isotope fractionation factor  $\alpha_{C37}$ -salinity relationship for cultures growing different strains of *Emiliana huxleyi* used in the statistical comparison. Dotted lines represent the linear regression model applied to the  $\alpha_{C37}$ -salinity relationship for each individual experiment.

Supplementary Table 1: Analysis of covariance data for comparison of the  $\alpha_{C37}$ -salinity relationships between different culture studies of *Emiliana huxleyi*.

| Analysis of Covariance (ANCOVA)      |              |
|--------------------------------------|--------------|
| Experiments                          | Significance |
| Schouten vs. M'Boule                 | 0.05         |
| Schouten vs. Alkalinity/Salinity     | 0.19         |
| Schouten vs. High Light              | 0.05         |
| <b>Schouten vs. Sachs</b>            | <b>0.01</b>  |
| M'Boule vs. Alkalinity/Salinity      | 0.19         |
| M'Boule vs. High Light               | 0.73         |
| <b>M'Boule vs. Sachs</b>             | <b>0.05</b>  |
| Alkalinity/Salinity vs. High Light   | 0.12         |
| <b>Alkalinity/Salinity vs. Sachs</b> | <b>0.00</b>  |
| High Light vs. Sachs                 | 0.07         |
| ALL                                  | <b>0.00</b>  |
